# Supplementary material for: Biogeography, diversity and environmental relationships of shelf and deep-sea benthic Amphipoda around Iceland
Source: PeerJ journal article supplement (doi:10.7717/peerj.11898), 2021-08-11
Supplement: Appendix4_SixClusters.pdf [file Appendix4_SixClusters.pdf]

+

-

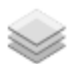

### Cluster

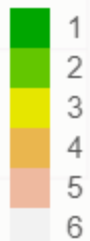

1

2

3

4

5

6

Island

300 km

200 mi

Cluster

United Kingdom
